# Supplementary material for: Hospital organizational context and delivery of evidence-based stroke care: a cross-sectional study
Source: Springer Nature journal article supplement (doi:10.1186/s13012-018-0849-z), 2019-01-18
Supplement: MOESM1 [file 16406244]

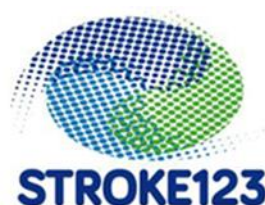

## STAFF SURVEY

To be completed in addition to the Alberta Context Tool

*If you work at multiple hospitals please answer this questionnaire with regards to where you are working today.*

Survey ID: \_\_\_\_\_ Hospital ID: \_\_\_\_\_

Date survey completed: DD/MM/20YY

Profession: ☐ DOCTOR  
☐ PHYSIOTHERAPIST  
☐ OCCUPATIONAL THERAPIST  
☐ NURSE  
☐ SPEECH PATHOLOGIST  
☐ DIETITIAN  
☐ ADMINISTRATOR/EXECUTIVE  
☐ OTHER \_\_\_\_\_

Please mark your *completed* education program(s). **(Select all that apply)**

☐ Diploma/Certificate  
☐ Bachelors Degree  
☐ Medical Degree  
☐ Masters Degree (in related area)  
☐ Doctorate

Current role at this hospital: \_\_\_\_\_

Number of months in current role: \_\_\_\_\_

Age \_\_\_\_\_

Gender: ☐ Male ☐ Female

Employment status: ☐ Full Time ☐ Part Time

Department / Unit: \_\_\_\_\_

### MANAGEMENT INVOLVEMENT

|                                                                                                                          | Strongly Disagree        | Disagree                 | Neither Agree Nor Disagree | Agree                    | Strongly Agree           |
|--------------------------------------------------------------------------------------------------------------------------|--------------------------|--------------------------|----------------------------|--------------------------|--------------------------|
| 1. There is adequate support from executive staff to achieve plans for improving stroke care within this hospital        | <input type="checkbox"/> | <input type="checkbox"/> | <input type="checkbox"/>   | <input type="checkbox"/> | <input type="checkbox"/> |
| 2. Robust two way communication processes are in place between staff and management across all levels of my organisation | <input type="checkbox"/> | <input type="checkbox"/> | <input type="checkbox"/>   | <input type="checkbox"/> | <input type="checkbox"/> |

|                                                                                                    |                          |                          |                            |                          |                          |
|----------------------------------------------------------------------------------------------------|--------------------------|--------------------------|----------------------------|--------------------------|--------------------------|
| 3. Regular, understandable updates are provided by management across all levels of my organisation | Strongly Disagree        | Disagree                 | Neither Agree Nor Disagree | Agree                    | Strongly Agree           |
|                                                                                                    | <input type="checkbox"/> | <input type="checkbox"/> | <input type="checkbox"/>   | <input type="checkbox"/> | <input type="checkbox"/> |

#### TEAMWORK / STAFF

|                                                                                                               |                          |                          |                            |                          |                          |
|---------------------------------------------------------------------------------------------------------------|--------------------------|--------------------------|----------------------------|--------------------------|--------------------------|
| 4. Multidisciplinary communication across the hospital facilitates effective care for stroke at this hospital | Strongly Disagree        | Disagree                 | Neither Agree Nor Disagree | Agree                    | Strongly Agree           |
|                                                                                                               | <input type="checkbox"/> | <input type="checkbox"/> | <input type="checkbox"/>   | <input type="checkbox"/> | <input type="checkbox"/> |

|                                                                                                                   |                          |                          |                            |                          |                          |
|-------------------------------------------------------------------------------------------------------------------|--------------------------|--------------------------|----------------------------|--------------------------|--------------------------|
| 5. My unit has a stable workforce the majority of the time (ie. limited use of agency or short term casual staff) | Strongly Disagree        | Disagree                 | Neither Agree Nor Disagree | Agree                    | Strongly Agree           |
|                                                                                                                   | <input type="checkbox"/> | <input type="checkbox"/> | <input type="checkbox"/>   | <input type="checkbox"/> | <input type="checkbox"/> |

|                                             |                          |                          |                            |                          |                          |
|---------------------------------------------|--------------------------|--------------------------|----------------------------|--------------------------|--------------------------|
| 6. Staff are familiar with stroke protocols | Strongly Disagree        | Disagree                 | Neither Agree Nor Disagree | Agree                    | Strongly Agree           |
|                                             | <input type="checkbox"/> | <input type="checkbox"/> | <input type="checkbox"/>   | <input type="checkbox"/> | <input type="checkbox"/> |

|                                                                                                                |                          |                          |                            |                          |                          |
|----------------------------------------------------------------------------------------------------------------|--------------------------|--------------------------|----------------------------|--------------------------|--------------------------|
| 7. The level of <b>medical</b> staff engagement facilitates an ability to improve stroke care at this hospital | Strongly Disagree        | Disagree                 | Neither Agree Nor Disagree | Agree                    | Strongly Agree           |
|                                                                                                                | <input type="checkbox"/> | <input type="checkbox"/> | <input type="checkbox"/>   | <input type="checkbox"/> | <input type="checkbox"/> |

|                                                                                                                      |                          |                          |                            |                          |                          |
|----------------------------------------------------------------------------------------------------------------------|--------------------------|--------------------------|----------------------------|--------------------------|--------------------------|
| 8. The level of <b>allied health</b> staff engagement facilitates an ability to improve stroke care at this hospital | Strongly Disagree        | Disagree                 | Neither Agree Nor Disagree | Agree                    | Strongly Agree           |
|                                                                                                                      | <input type="checkbox"/> | <input type="checkbox"/> | <input type="checkbox"/>   | <input type="checkbox"/> | <input type="checkbox"/> |

|                                                                                                                |                          |                          |                            |                          |                          |
|----------------------------------------------------------------------------------------------------------------|--------------------------|--------------------------|----------------------------|--------------------------|--------------------------|
| 9. The level of <b>nursing</b> staff engagement facilitates an ability to improve stroke care at this hospital | Strongly Disagree        | Disagree                 | Neither Agree Nor Disagree | Agree                    | Strongly Agree           |
|                                                                                                                | <input type="checkbox"/> | <input type="checkbox"/> | <input type="checkbox"/>   | <input type="checkbox"/> | <input type="checkbox"/> |

#### ORGANISATIONAL CHANGE

|                                                                               |                          |                          |                            |                          |                          |
|-------------------------------------------------------------------------------|--------------------------|--------------------------|----------------------------|--------------------------|--------------------------|
| 10. I have sufficient opportunities to question managers about change at work | Strongly Disagree        | Disagree                 | Neither Agree Nor Disagree | Agree                    | Strongly Agree           |
|                                                                               | <input type="checkbox"/> | <input type="checkbox"/> | <input type="checkbox"/>   | <input type="checkbox"/> | <input type="checkbox"/> |

|                                                     |                          |                          |                            |                          |                          |
|-----------------------------------------------------|--------------------------|--------------------------|----------------------------|--------------------------|--------------------------|
| 11. Staff are always consulted about change at work | Strongly Disagree        | Disagree                 | Neither Agree Nor Disagree | Agree                    | Strongly Agree           |
|                                                     | <input type="checkbox"/> | <input type="checkbox"/> | <input type="checkbox"/>   | <input type="checkbox"/> | <input type="checkbox"/> |

- |                                                                                  |                          |                          |                            |                          |                          |
|----------------------------------------------------------------------------------|--------------------------|--------------------------|----------------------------|--------------------------|--------------------------|
| 12. When changes are made at work, I am clear how they will work out in practice | Strongly Disagree        | Disagree                 | Neither Agree Nor Disagree | Agree                    | Strongly Agree           |
|                                                                                  | <input type="checkbox"/> | <input type="checkbox"/> | <input type="checkbox"/>   | <input type="checkbox"/> | <input type="checkbox"/> |
- 
- |                                                                                                                              |                          |                          |                            |                          |                          |                          |
|------------------------------------------------------------------------------------------------------------------------------|--------------------------|--------------------------|----------------------------|--------------------------|--------------------------|--------------------------|
| 13. The introduction of protocols or care pathways for stroke has been effective for improving care for patients with stroke | Strongly Disagree        | Disagree                 | Neither Agree Nor Disagree | Agree                    | Strongly Agree           | Not applicable           |
|                                                                                                                              | <input type="checkbox"/> | <input type="checkbox"/> | <input type="checkbox"/>   | <input type="checkbox"/> | <input type="checkbox"/> | <input type="checkbox"/> |
- 
- |                                                                                                                    |                          |                          |                            |                          |                          |
|--------------------------------------------------------------------------------------------------------------------|--------------------------|--------------------------|----------------------------|--------------------------|--------------------------|
| 14. Access to patient and family education about stroke provided by hospital staff is adequate to meet their needs | Strongly Disagree        | Disagree                 | Neither Agree Nor Disagree | Agree                    | Strongly Agree           |
|                                                                                                                    | <input type="checkbox"/> | <input type="checkbox"/> | <input type="checkbox"/>   | <input type="checkbox"/> | <input type="checkbox"/> |

#### OTHER

- |                                                                                                                        |                          |                          |                            |                          |                          |
|------------------------------------------------------------------------------------------------------------------------|--------------------------|--------------------------|----------------------------|--------------------------|--------------------------|
| 15. The Queensland Health Stroke Services Clinical Network has had a positive impact on stroke care within my hospital | Strongly Disagree        | Disagree                 | Neither Agree Nor Disagree | Agree                    | Strongly Agree           |
|                                                                                                                        | <input type="checkbox"/> | <input type="checkbox"/> | <input type="checkbox"/>   | <input type="checkbox"/> | <input type="checkbox"/> |
- 
- |                                                                                                                                   |  |  |  |  |  |
|-----------------------------------------------------------------------------------------------------------------------------------|--|--|--|--|--|
| 16. The Queensland Health Stroke Services Clinical Network has had a positive impact on stroke care within my area health network |  |  |  |  |  |
|-----------------------------------------------------------------------------------------------------------------------------------|--|--|--|--|--|
- 
- |                                                                                                                                                                                             |                          |                          |                            |                          |                          |
|---------------------------------------------------------------------------------------------------------------------------------------------------------------------------------------------|--------------------------|--------------------------|----------------------------|--------------------------|--------------------------|
| 17. Professional development opportunities (including attending education or in-service sessions) for clinical staff has improved knowledge about clinical care for stroke at this hospital | Strongly Disagree        | Disagree                 | Neither Agree Nor Disagree | Agree                    | Strongly Agree           |
|                                                                                                                                                                                             | <input type="checkbox"/> | <input type="checkbox"/> | <input type="checkbox"/>   | <input type="checkbox"/> | <input type="checkbox"/> |

18. What type of performance information do you currently use for quality improvement planning and activities? **(tick all that apply)**

- ☐ None
- ☐ Intermittent internal audits
- ☐ Regular internal audits
- ☐ Access to continuous feedback via internal stroke register or AuSCR
- ☐ Queensland Stroke Services Clinical Network data
- ☐ National Stroke Foundation audit
- ☐ Other (Please Specify) \_\_\_\_\_

19. Have you been directly involved in a quality improvement initiative or program for improving stroke care at this hospital?

- ☐ Yes
- ☐ No

If yes, was this undertaken: internally by

- ☐ local staff
- ☐ an external facilitator
- ☐ both
